# Supplementary material
Source: PubMed Central journal article supplement (PMC1698899)
Supplement: 7601453s2.pdf [file 7601453s2.pdf]

(A) The strain *zap1Δ* containing either pRS-VP16 (vector) or pVP16-ZAP1 was grown overnight in synthetic deplete media lacking uracil. Five  $\mu\text{l}$  of a cell suspension ( $\text{OD}^{600}$  1.0) and four 10-fold serial dilutions were plated onto SD -URA media supplemented with [-Zn] or without [+Zn] 1 mM EDTA and 1  $\mu\text{M}$   $\text{Zn}^{2+}$ . Plates were grown for 3 days at 30°C. (B) The strains described in panel A were transformed with the minimal ZRE-*lacZ* reporter pDg2L. Cells were grown to exponential phase in LZM supplemented with either 500  $\mu\text{M}$  zinc (white bars) or 3000  $\mu\text{M}$  zinc (gray bars) or in standard synthetic media (black bars) and  $\beta$ -galactosidase activity measured in triplicate by standard procedures.
