# Supplementary material
Source: PubMed Central journal article supplement (PMC1698899)
Supplement: 7601453s4.pdf [file 7601453s4.pdf]

Table II. Yeast strains used in this study

| Strain   | Genotype                                                                                                     | Reference/Source    |
|----------|--------------------------------------------------------------------------------------------------------------|---------------------|
| BY4741   | Mata <i>his3Δ1 leu2Δ 0 met15Δ 0 ura3Δ0</i>                                                                   | Invitrogen Corp.    |
| YOL086c  | Mata <i>his3Δ1 leu2Δ 0 met15Δ 0 ura3Δ0 adh1Δ::kanMX4</i>                                                     | Invitrogen Corp.    |
| YMR083w  | Mata <i>his3Δ1 leu2Δ 0 met15Δ 0 ura3Δ0 adh3Δ::kanMX4</i>                                                     | Invitrogen Corp.    |
| YGL256w  | Mata <i>his3Δ1 leu2Δ 0 met15Δ 0 ura3Δ0 adh4Δ::kanMX4</i>                                                     | Invitrogen Corp.    |
| YJL056c  | Mata <i>his3Δ1 leu2Δ 0 met15Δ 0 ura3Δ0 zap1Δ::kanMX4</i>                                                     | Invitrogen Corp.    |
| ABY61    | Mata <i>his3Δ1 leu2Δ 0 met15Δ 0 ura3Δ0 trp1Δ::kanMX4 TAP-ZAP1</i>                                            | This work           |
| RAP1-TAP | Mata <i>his3Δ1 leu2Δ 0 met15Δ 0 ura3Δ0 RAP1-TAP::HIS3MX6</i>                                                 | (Lieb et al., 2001) |
| ABY64    | Mata <i>his3Δ1 leu2Δ 0 met15Δ 0 ura3Δ0 trp1Δ::kanMX4 ADH4-3HA::TRP1</i>                                      | This work           |
| ABY69    | Mata <i>his3Δ1 leu2Δ 0 met15Δ 0 ura3Δ0 trp1Δ::kanMX4 ADH1-3HA::TRP1</i>                                      | This work           |
| ABY71    | Mata <i>his3Δ1 leu2Δ 0 met15Δ 0 ura3Δ0 trp1Δ::kanMX4 ADH3-3HA::TRP1</i>                                      | This work           |
| ABY74    | Mata <i>his3Δ1 leu2Δ 0 met15Δ 0 ura3Δ0 trp1Δ::kanMX4 ADH3-3HA::TRP1 zap1Δ::kanMX4</i>                        | This work           |
| ABY77    | Mata <i>his3Δ1 leu2Δ0 met15Δ0 ura3Δ0 trp1Δ::kanMX4 ADH1-3HA::TRP1 zap1Δ::kanMX4</i>                          | This work           |
| ABY79    | Mata <i>his3Δ1 leu2Δ 0 met15Δ 0 ura3Δ0 ADH1<sup>ZRE</sup>::K1URA3 kanMX4</i>                                 | This work           |
| ABY80    | Mata <i>his3Δ1 leu2Δ 0 met15Δ 0 ura3Δ0 ADH3<sup>ZRE</sup>::K1URA3 kanMX4</i>                                 | This work           |
| YM4271   | Mata <i>ura3-52 his3-Δ200 ade2-101 lys2-801 leu2-3,112 trp1-901 tyr1-501 gal4-Δ512 gal80-Δ538 ade5::hisG</i> | Clontech            |

The strain ABY61, containing Zap1 Tap-tagged at the N-terminus, was created according to the method described by (Puig et al., 2001). The strains ABY64, ABY69 and ABY71 were generated by PCR-based gene modification using the template pFA6a-3HA-TRP1 (Longtine et al., 1998). Strains ABY74 and ABY75 were derived from crosses with BY4742 *zap1Δ* using standard procedures. Strains ABY79 and ABY80 were generated by replacement of the *ADH1* and *ADH3* ZRE elements with the CORE cassette (containing the *KIURA3* and *KanMX4* genes) (Storici et al., 2001).
